# Supplementary material for: Creating a 3D microenvironment for monocyte cultivation: ECM-mimicking hydrogels based on gelatine and hyaluronic acid derivatives
Source: PubMed Central journal article supplement (PMC9078457; doi:10.1039/c7ra13739g), 2018-02-16
Supplement: RA-008-C7RA13739G-s001.pdf [file RA-008-C7RA13739G-s001.pdf]

Bystroňová et. al.: Creating a 3D Microenvironment for Monocyte Cultivation: ECM-Mimicking Hydrogels Based on Gelatine and Hyaluronic Acid Derivatives - Supplement

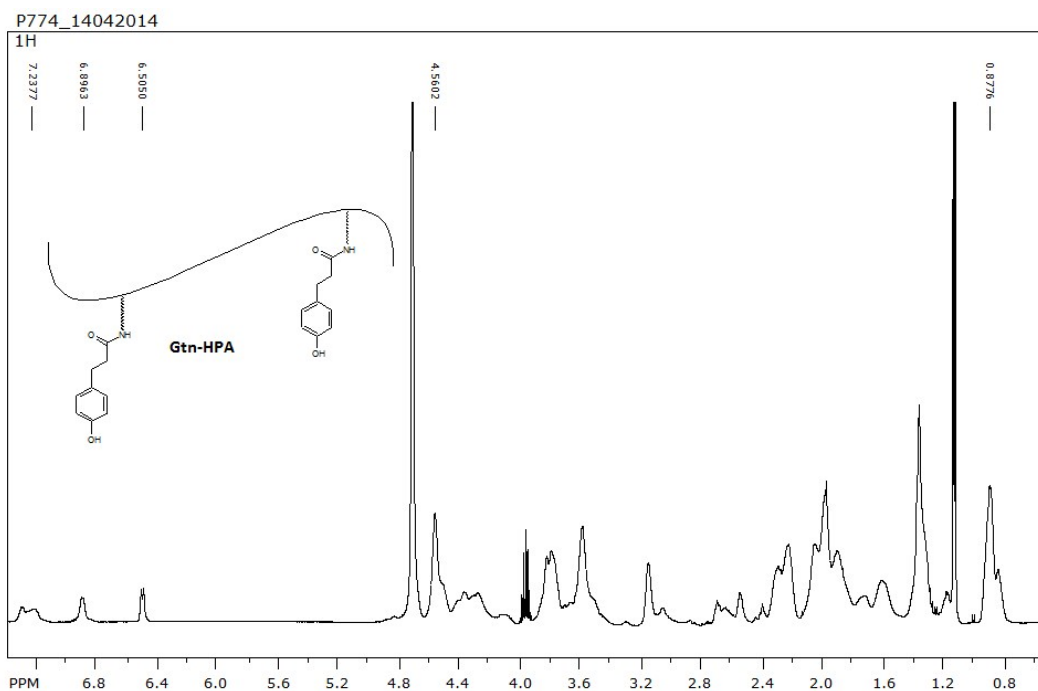

**Figure S1: <sup>1</sup>H NMR spectrum of Gtn-HPA Signals assignment** - <sup>1</sup>H NMR: (D<sub>2</sub>O, ppm) δ:0.88 – 4.56 (Gtn backbone); 6.50 (d, 2 H arom of HPA); 6.90 (s, 2 H arom of HPA); 7.15 – 7.35 (aromatic acid residues of Gtn backbone).

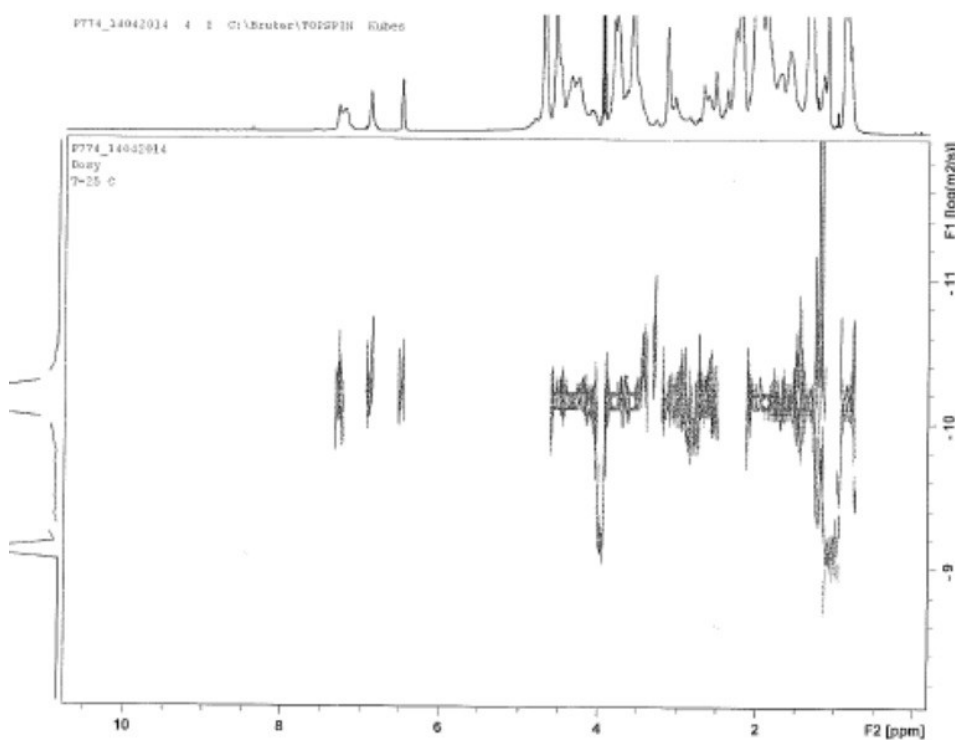

**Figure S2: DOSY spectrum of Gtn-HPA**

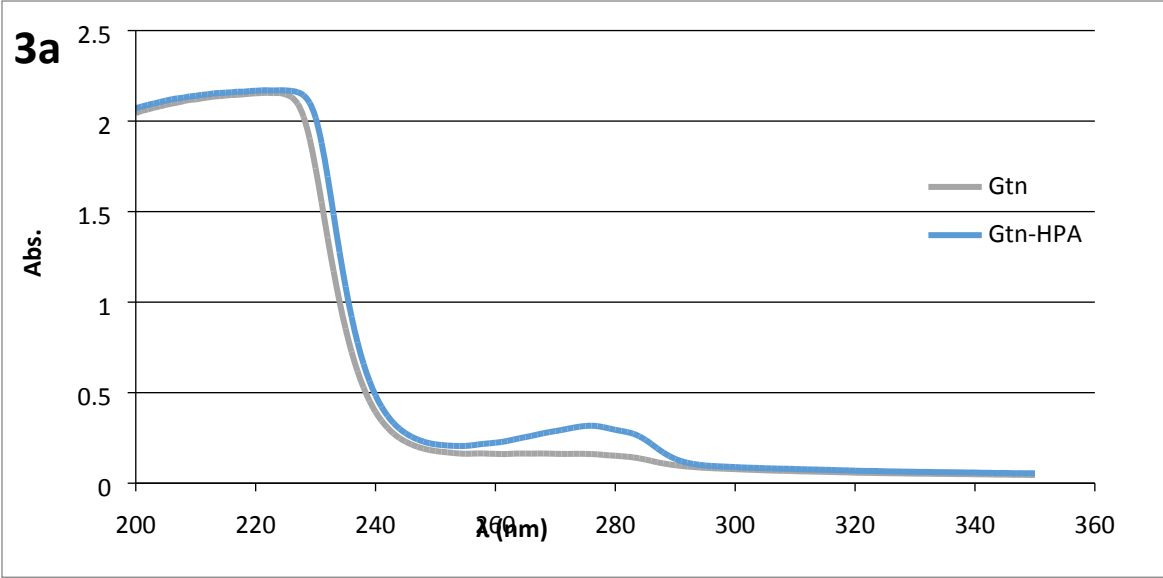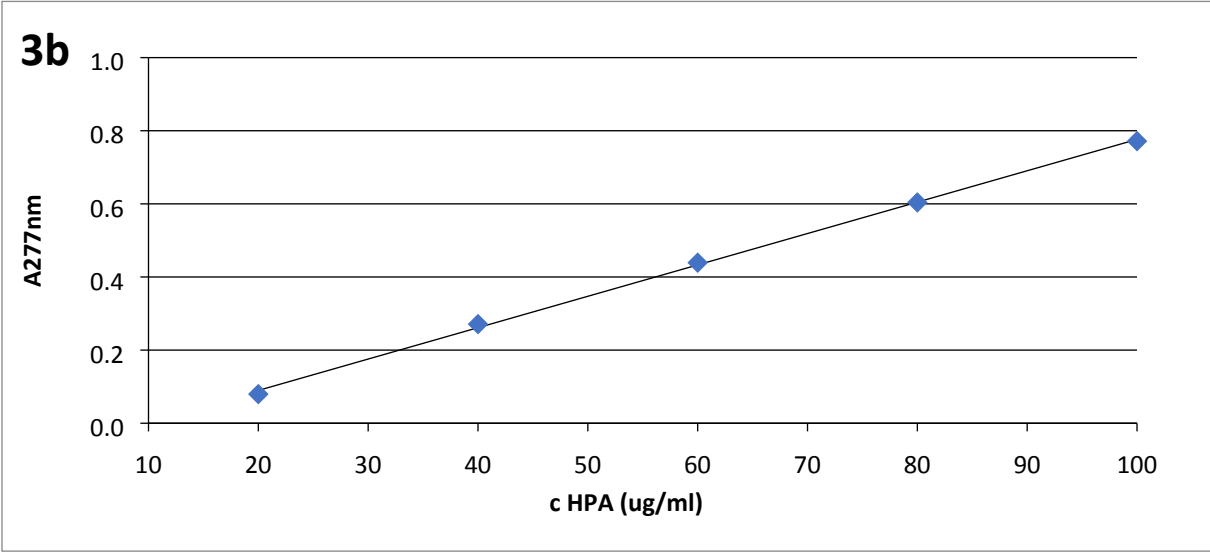

Figure S3: a) UV/VIS spectra of prepared Gtn-HPA conjugate b) calibration curve of HPA in the solution of gelatin (2 mg/ml)

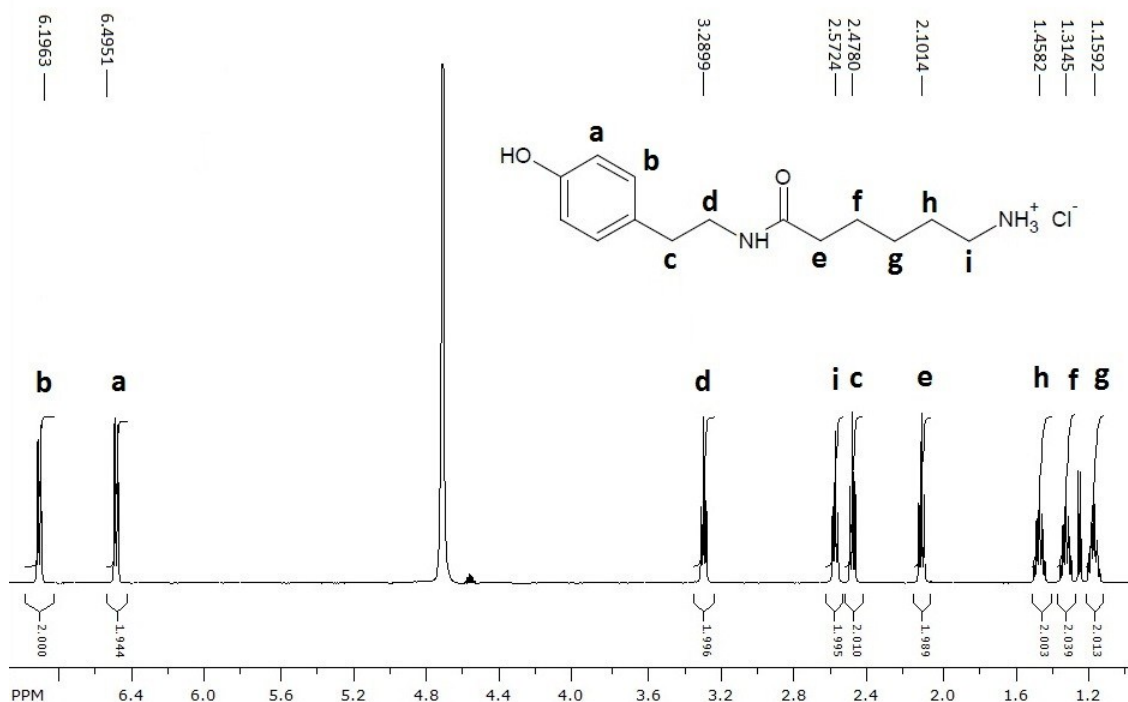

**Figure S4:  $^1\text{H}$  NMR spectrum of 6-amino-N-[2-(4-hydroxyphenyl)ethyl]hexanamide (Ahx-TA). Signals assignment:**  $^1\text{H}$  NMR: ( $\text{D}_2\text{O}+\text{NaOD}$ , ppm)  $\delta$ : 1.16 (m, 2 H,  $\gamma$ - $\text{CH}_2$ - hexanoic acid); 1.31 (m, 2 H,  $\beta$ - $\text{CH}_2$ - hexanoic acid); 1.46 (m, 2 H,  $\delta$ - $\text{CH}_2$ -hexanoic acid); 2.10 (t, 2 H,  $-\text{CH}_2$ -CO-); 2.48 (t, 2 H,  $-\text{CH}_2$ -Ar); 2.78 (t, 2 H,  $-\text{CH}_2$ - $\text{NH}_2$ ); 3.29 (t, 2 H,  $-\text{CH}_2$ -NH-CO); 6.50 (d, 2 H, C6-arom); 6.90 (s, 2 H, C4-arom).

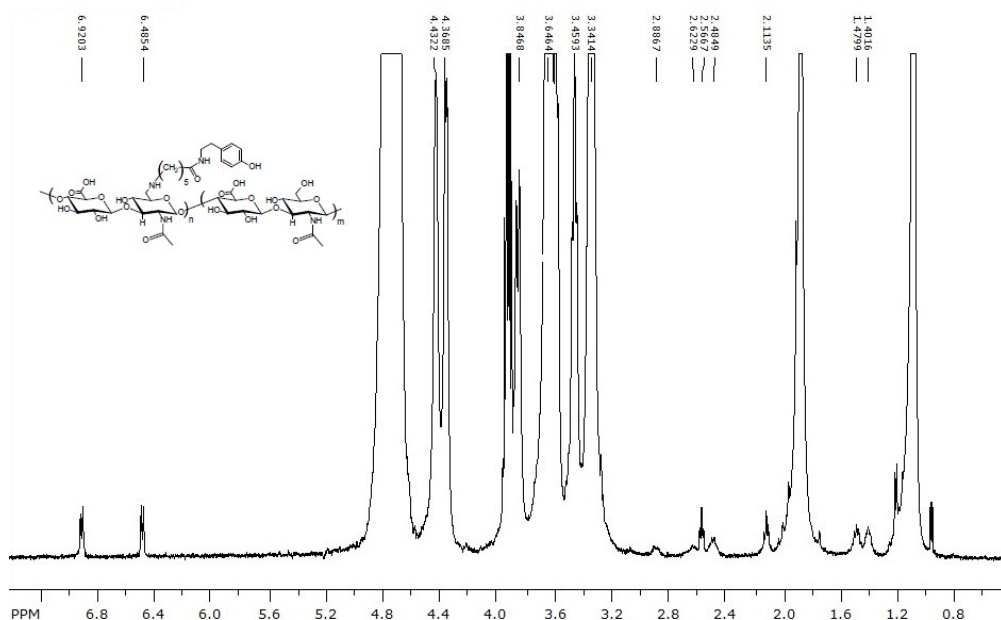

**Figure S5:  $^1\text{H}$  NMR spectrum of HA-TA Signals assignment:** HA- TA  $^1\text{H}$  NMR ( $\text{D}_2\text{O}+\text{NaOD}$ )  $\delta$ : 1.20 (m, 4 H,  $\gamma$ - $\text{CH}_2$ -hexanoic acid); 1.33 - 1.40 (m, 4 H,  $\beta$ - $\text{CH}_2$ -hexanoic acid); 1.46 (m, 4 H,  $\delta$ - $\text{CH}_2$ -hexanoic acid); 2.01 (s, 3 H,  $\text{CH}_3$ -CO), 2.11 (t, 2 H,  $-\text{CH}_2$ -CO-), 2.49 (m, 2 H,  $-\text{CH}_2$ -NH-HA), 2.56 (t, 2 H, Ph- $\text{CH}_2$ - $\text{CH}_2$ -), 2.63 and 2.89 (diastereotopic 2H, HA- $\text{CH}_2$ -NH-), 3.27 (t, 2 H, Ph- $\text{CH}_2$ - $\text{CH}_2$ -), 3.37 - 3.86 (m, 10 H, hyaluronan body), 4.36 (s, 1H, anomer O- $\text{CH}(\text{OH})$ -), 4.43 (s, 1H anomer, O- $\text{CH}(\text{OH})$ -), 6.49 (d, 2H, arom.), 6.92 (d, 2H, arom.).
